# Supplementary material
Source: publisher figshare collection journal article supplement (https://diabetesjournals.figshare.com/ndownloader/files/28917213)
Supplement: Supplementary file 1 [file 28917213]

## Sheet: Sheet1
Table S1. Intra-twin-pair correlations between miRNA expression and fasting glucose levels (p<0.05).
Within-twin-pair differences of the measures were calculated by subtracting the non-diabetic co-twin’s value from the T2D co-twin’s value. Intra–twin-pair correlations between within–twin-pair differences in MZ twins were analyzed using Spearman’s statistics.
miRNA	rho	P
miR-128	0.648	0.0226858
miR-151b	0.651	0.0217247
miR-26b	0.666	0.0181751
miR-30b	0.606	0.0367585
